# Supplementary material
Source: PubMed Central journal article supplement (PMC4350767)

## SUPPORTING INFORMATION

### Synthesis of a 2,4,6,8,10-dodecapentanoic acid thioester as a substrate for biosynthesis of Heat Stable Antifungal Factor (HSAF)

A. S. Olson, H. Chen, L. Du, and P. H. Dussault\*

| <sup>1</sup> H and <sup>13</sup> C NMR data                                                                                   | page |
|-------------------------------------------------------------------------------------------------------------------------------|------|
| (2 <i>E</i> ,4 <i>E</i> ,6 <i>E</i> )- <i>N</i> -Methoxy- <i>N</i> -methyl-octa-2,4,6-trienamide                              | 2    |
| ((2 <i>E</i> ,4 <i>E</i> ,6 <i>E</i> )-Octa-2,4,6-trienal                                                                     | 4    |
| (2 <i>E</i> ,4 <i>E</i> ,6 <i>E</i> ,8 <i>E</i> )- <i>N</i> -Methoxy- <i>N</i> -methyl-deca-2,4,6,8-tetraenamide              | 6    |
| (2 <i>E</i> ,4 <i>E</i> ,6 <i>E</i> ,8 <i>E</i> )-Deca-2,4,6,8-tetraenal                                                      | 8    |
| (4 <i>E</i> ,6 <i>E</i> ,8 <i>E</i> ,10 <i>E</i> )-3-Hydroxydodeca-4,6,8,10-tetraenoic acid                                   | 10   |
| <i>S</i> -(2-Acetamidoethyl) (4 <i>E</i> ,6 <i>E</i> ,8 <i>E</i> ,10 <i>E</i> )-3-hydroxydodeca-4,6,8,10-tetraenethioate      | 12   |
| <i>S</i> -(2-Acetamidoethyl) (2 <i>E</i> ,4 <i>E</i> ,6 <i>E</i> ,8 <i>E</i> ,10 <i>E</i> )-dodeca-2,4,6,8,10-pentaenethioate | 14   |

<sup>1</sup>H NMR of (3)

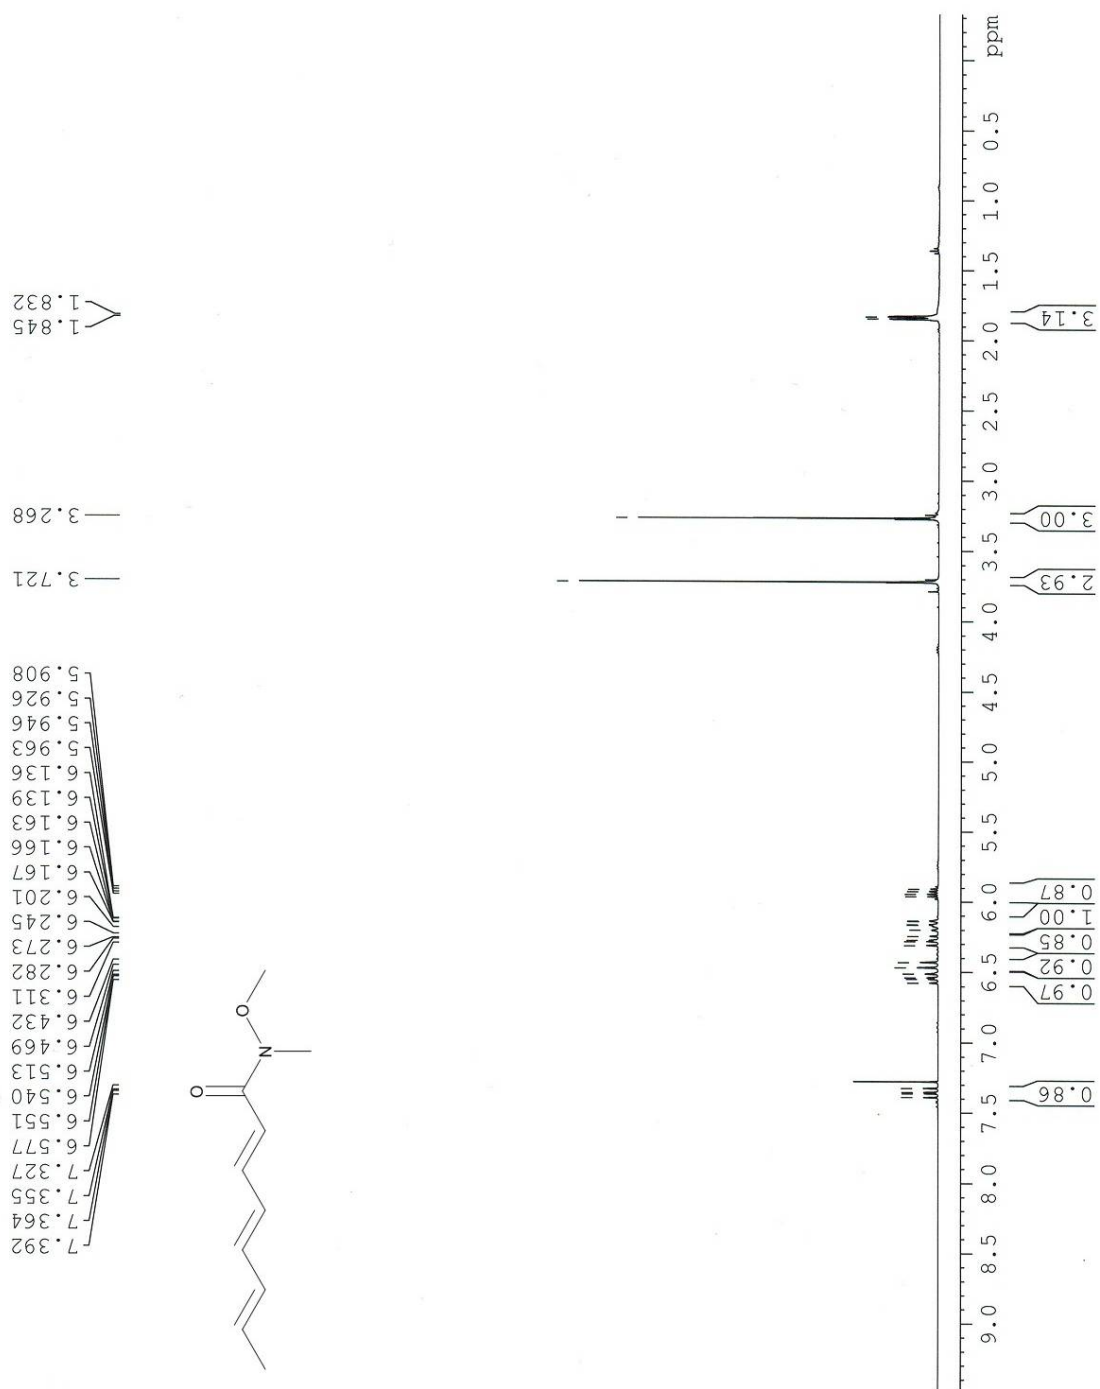

<sup>13</sup>C NMR of (3)

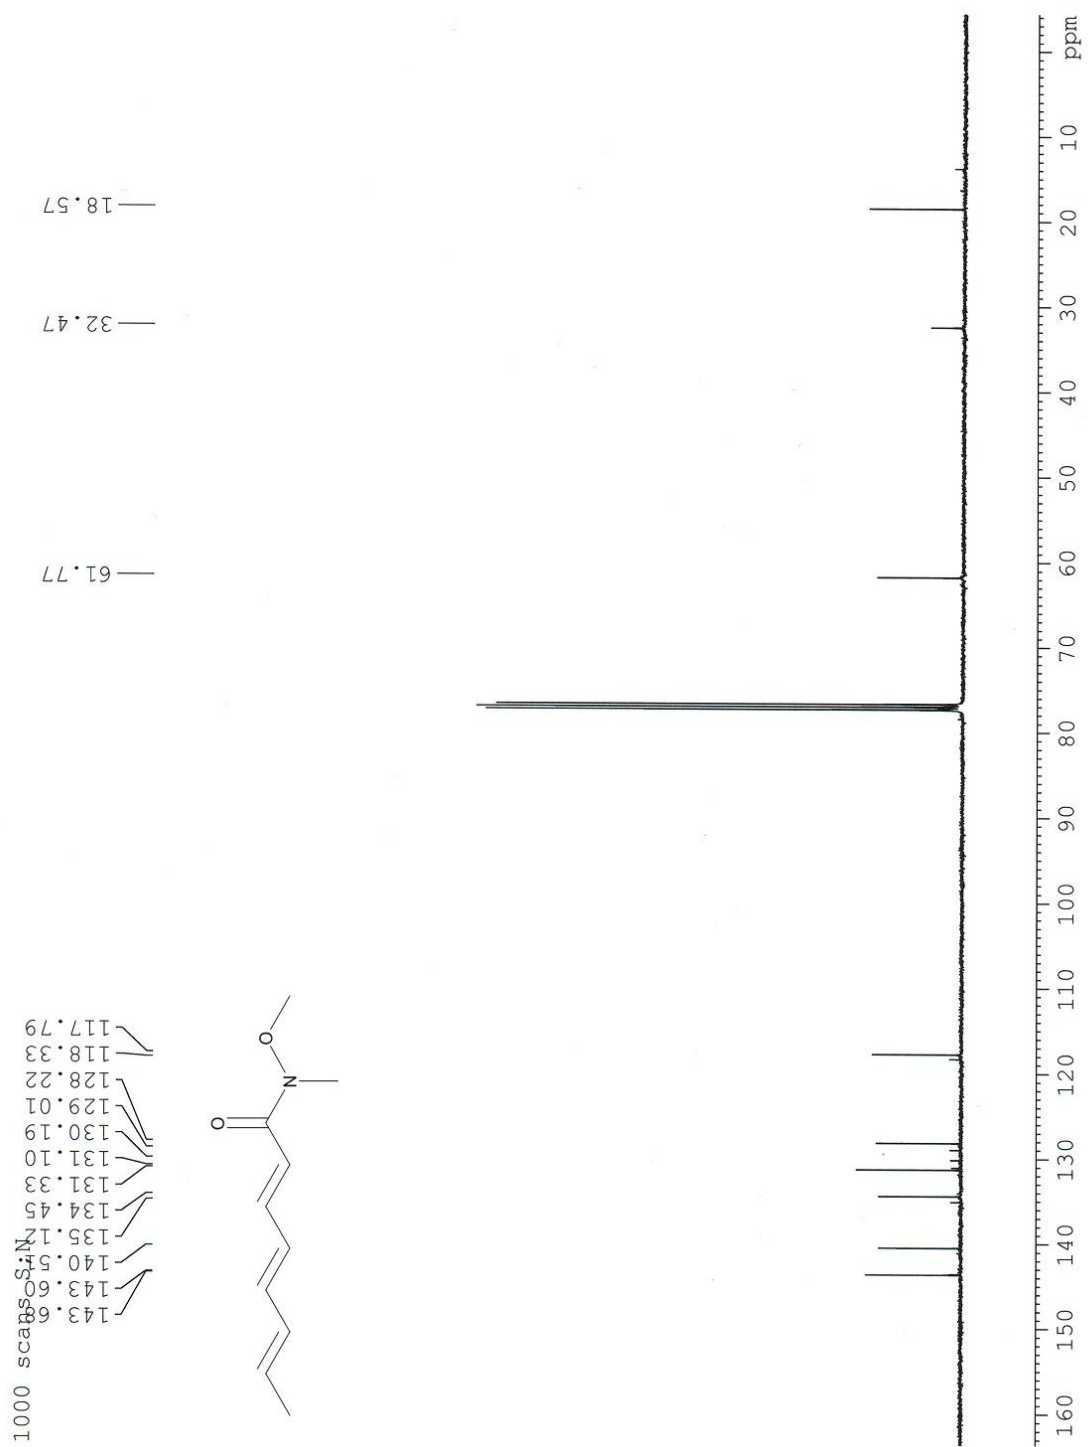

<sup>1</sup>H NMR of (4)

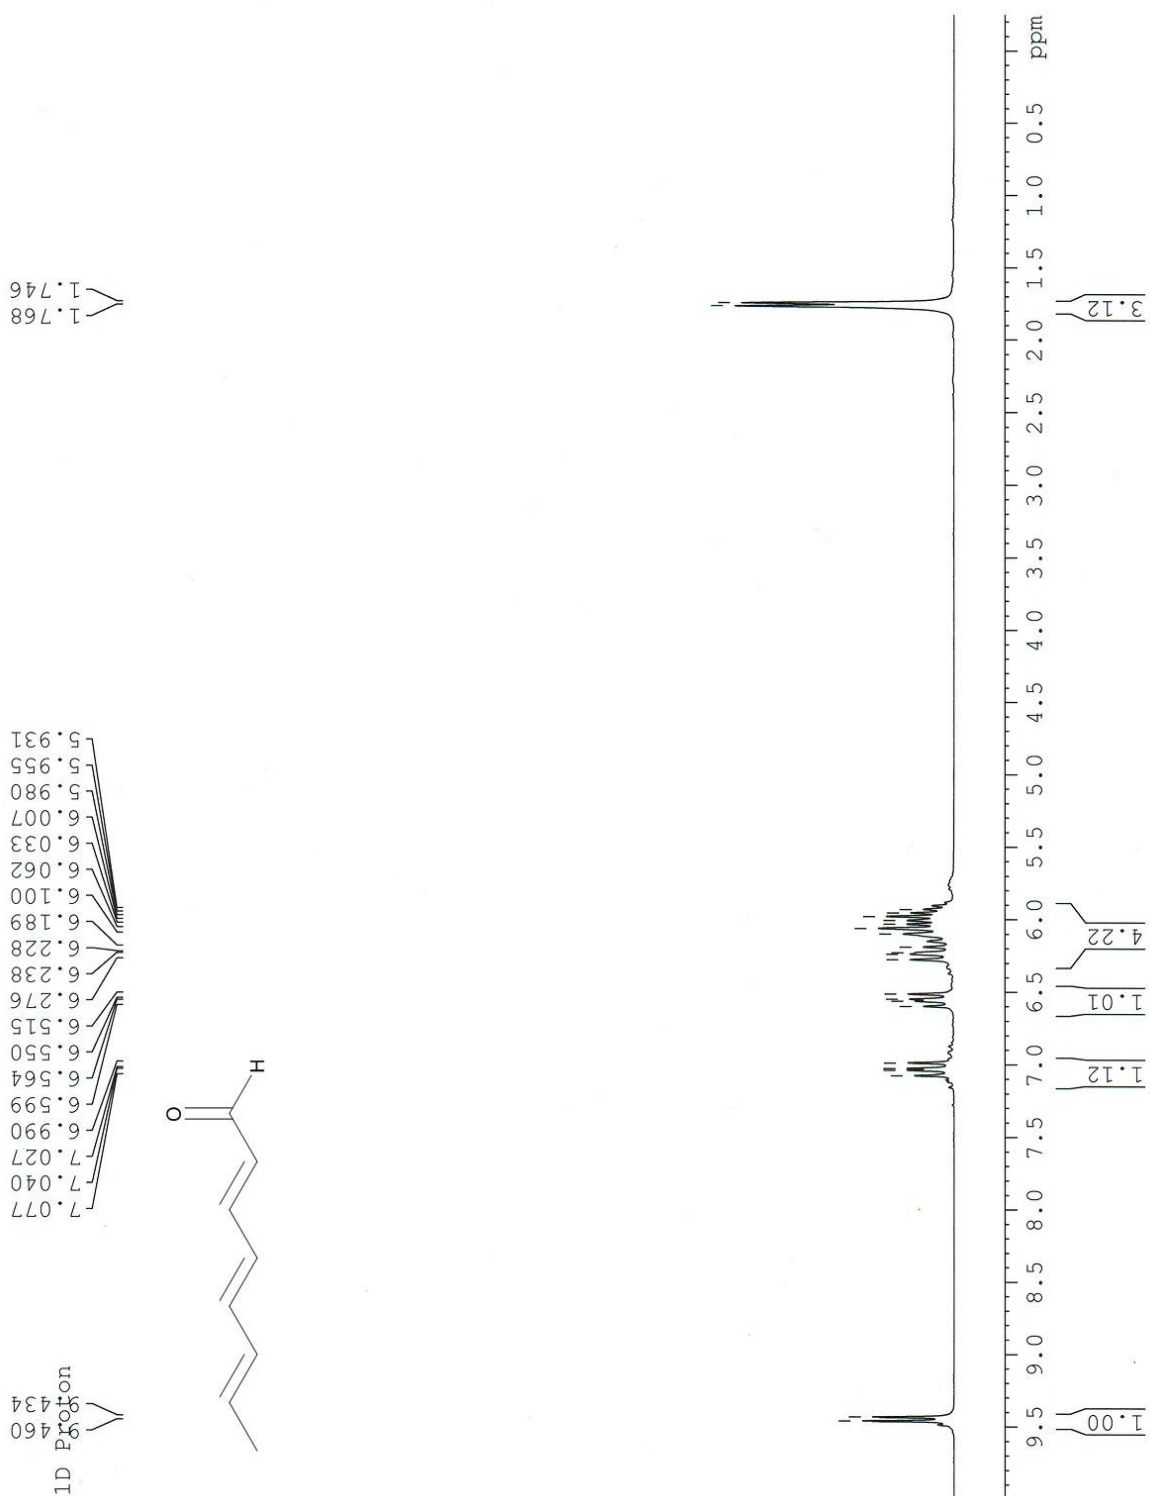

<sup>13</sup>C NMR of (4)

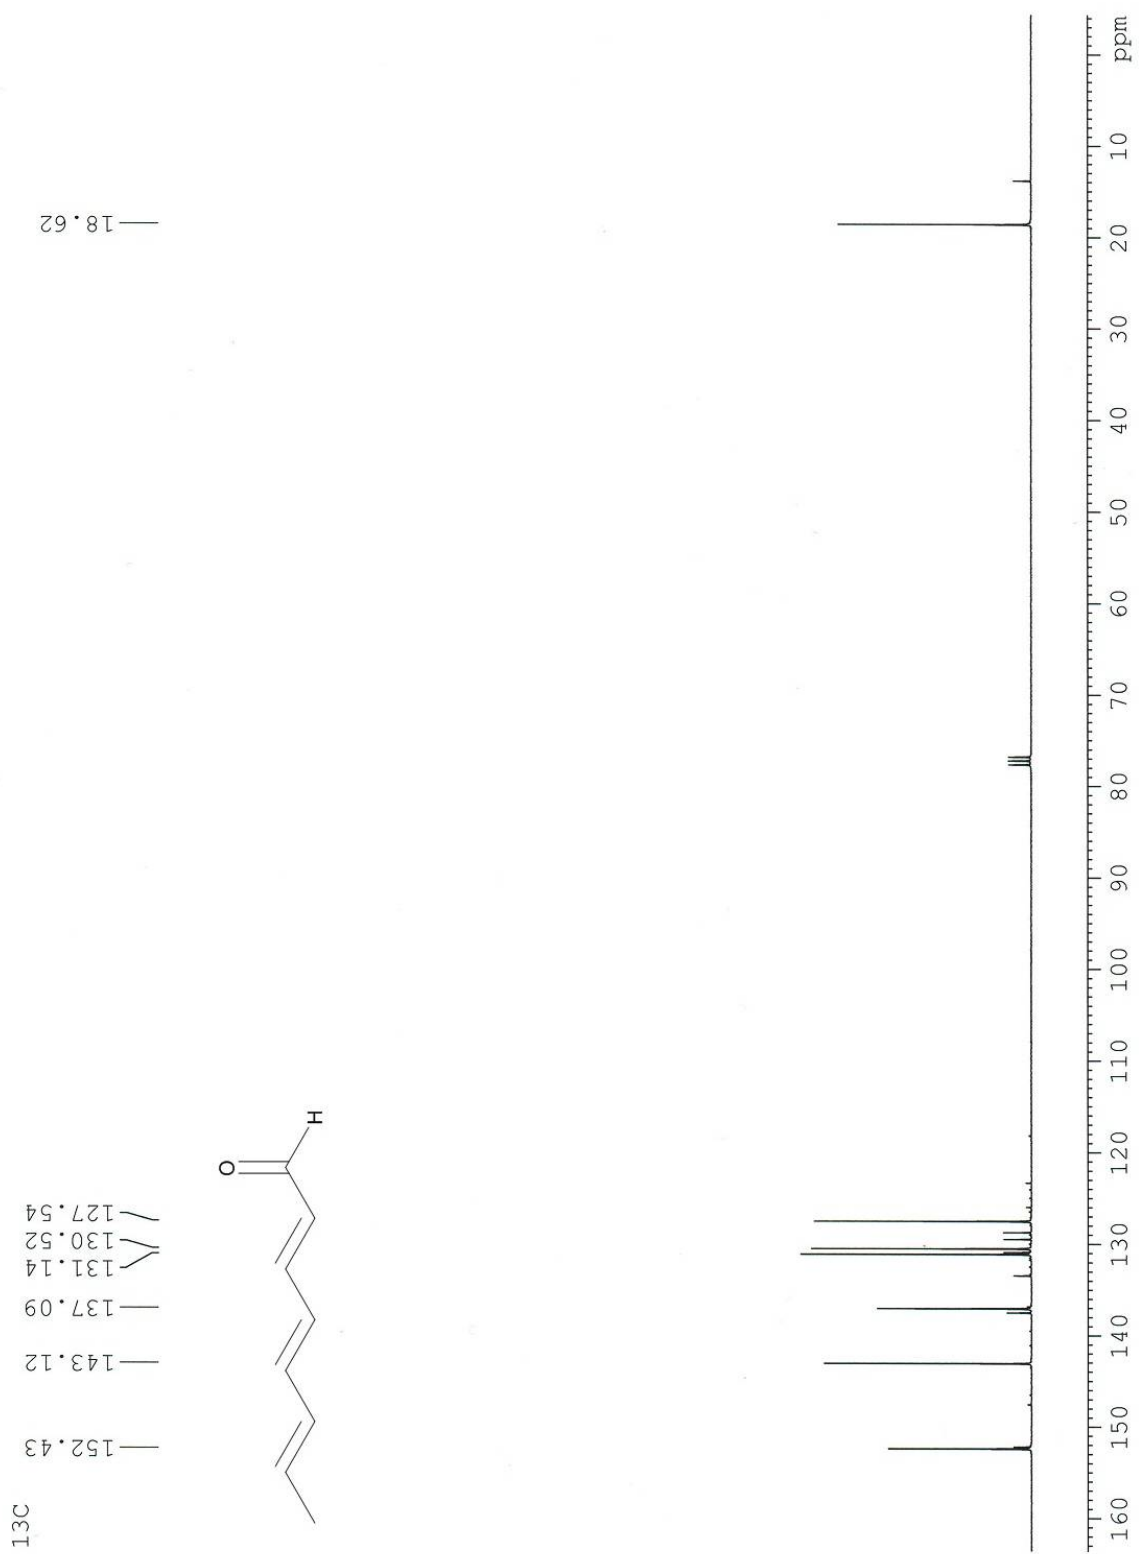



<sup>13</sup>C NMR of (5)

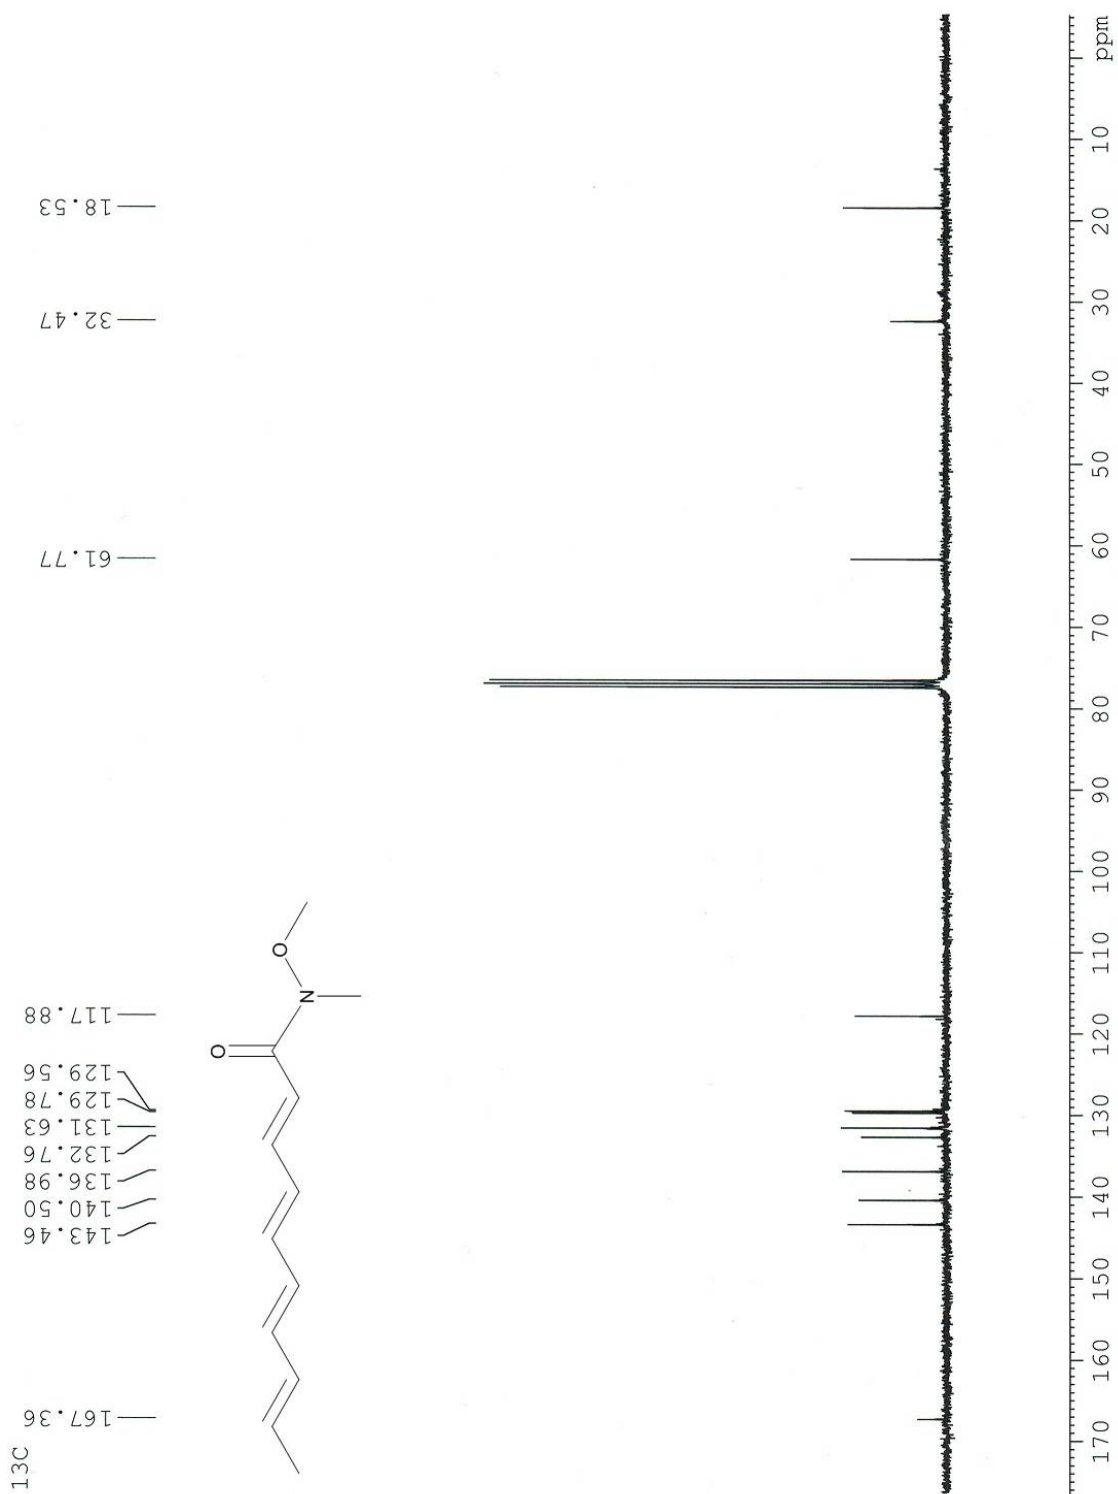

<sup>1</sup>H NMR of (6)

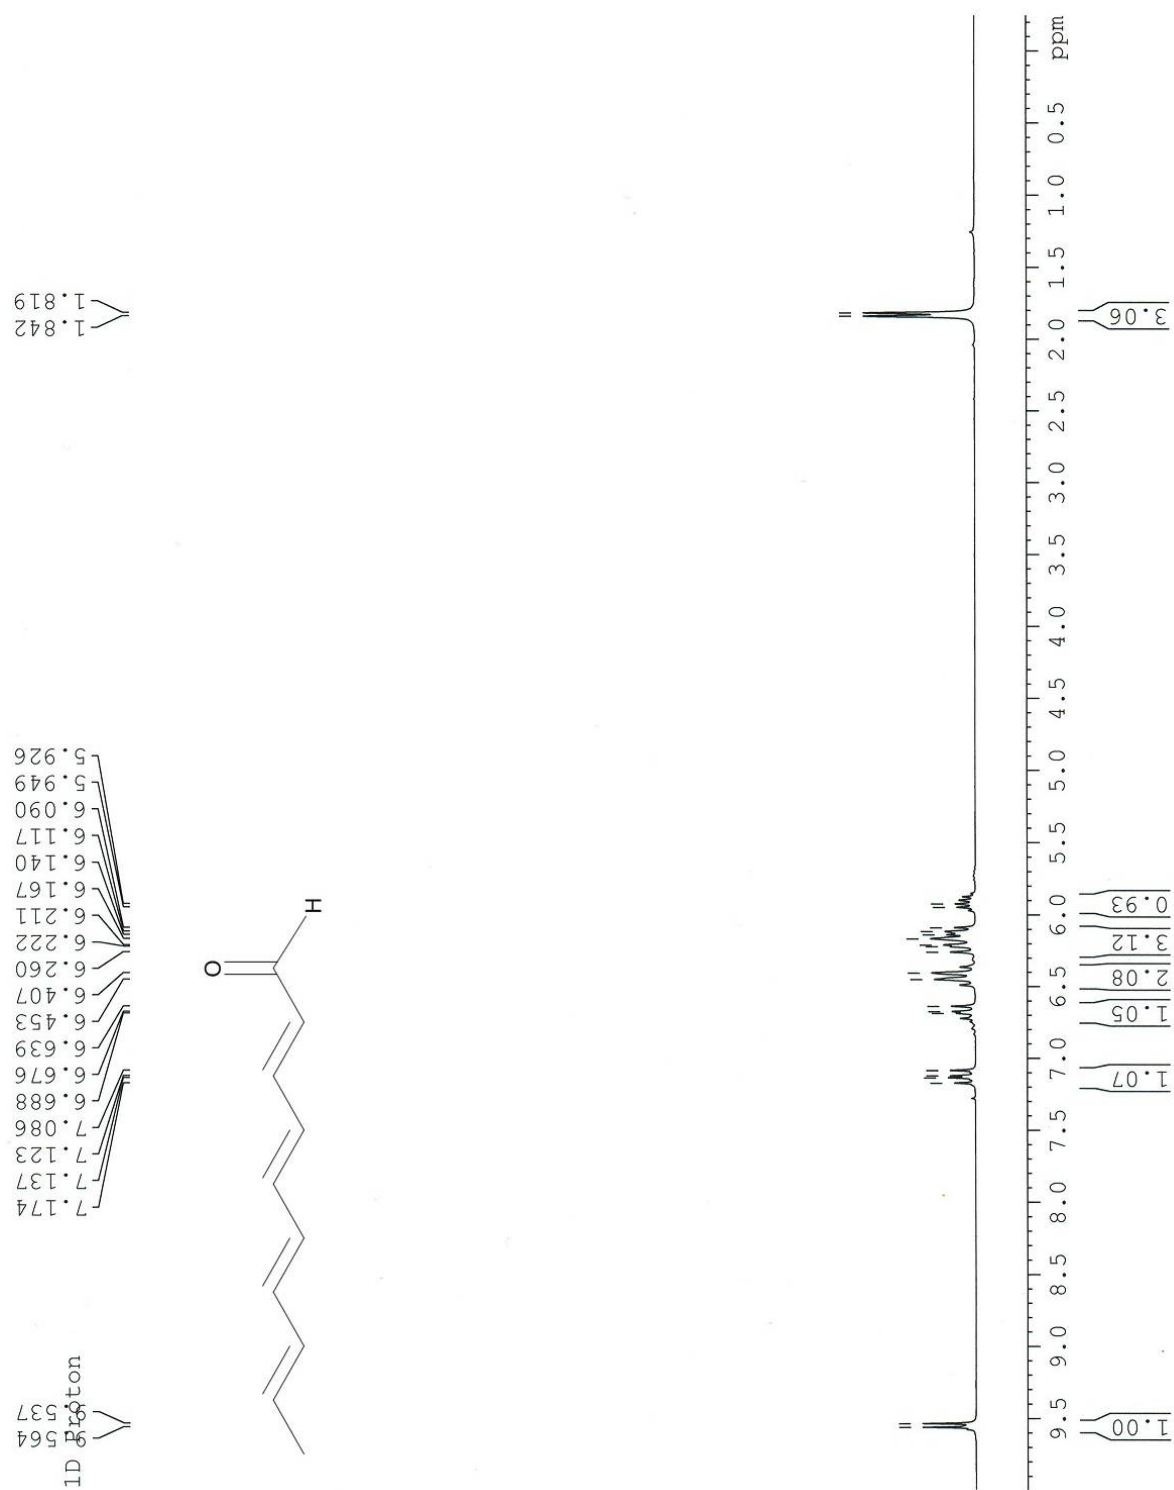



<sup>13</sup>C NMR of (6)

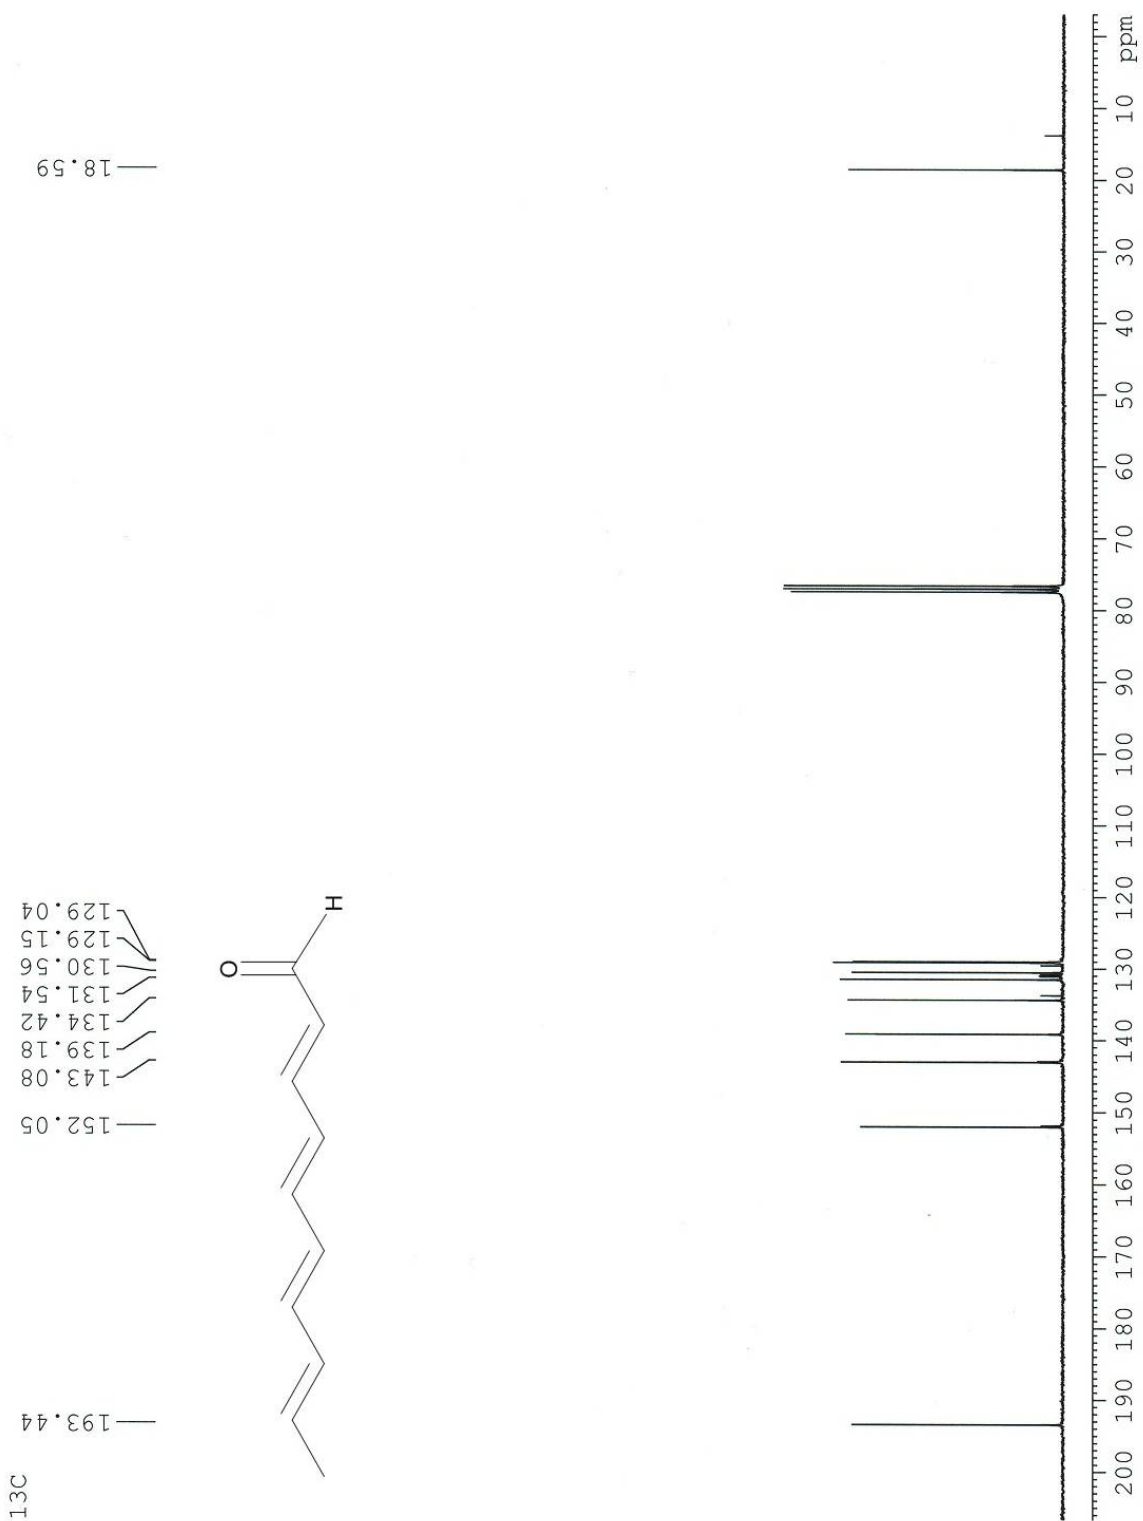

<sup>1</sup>H NMR of (7)

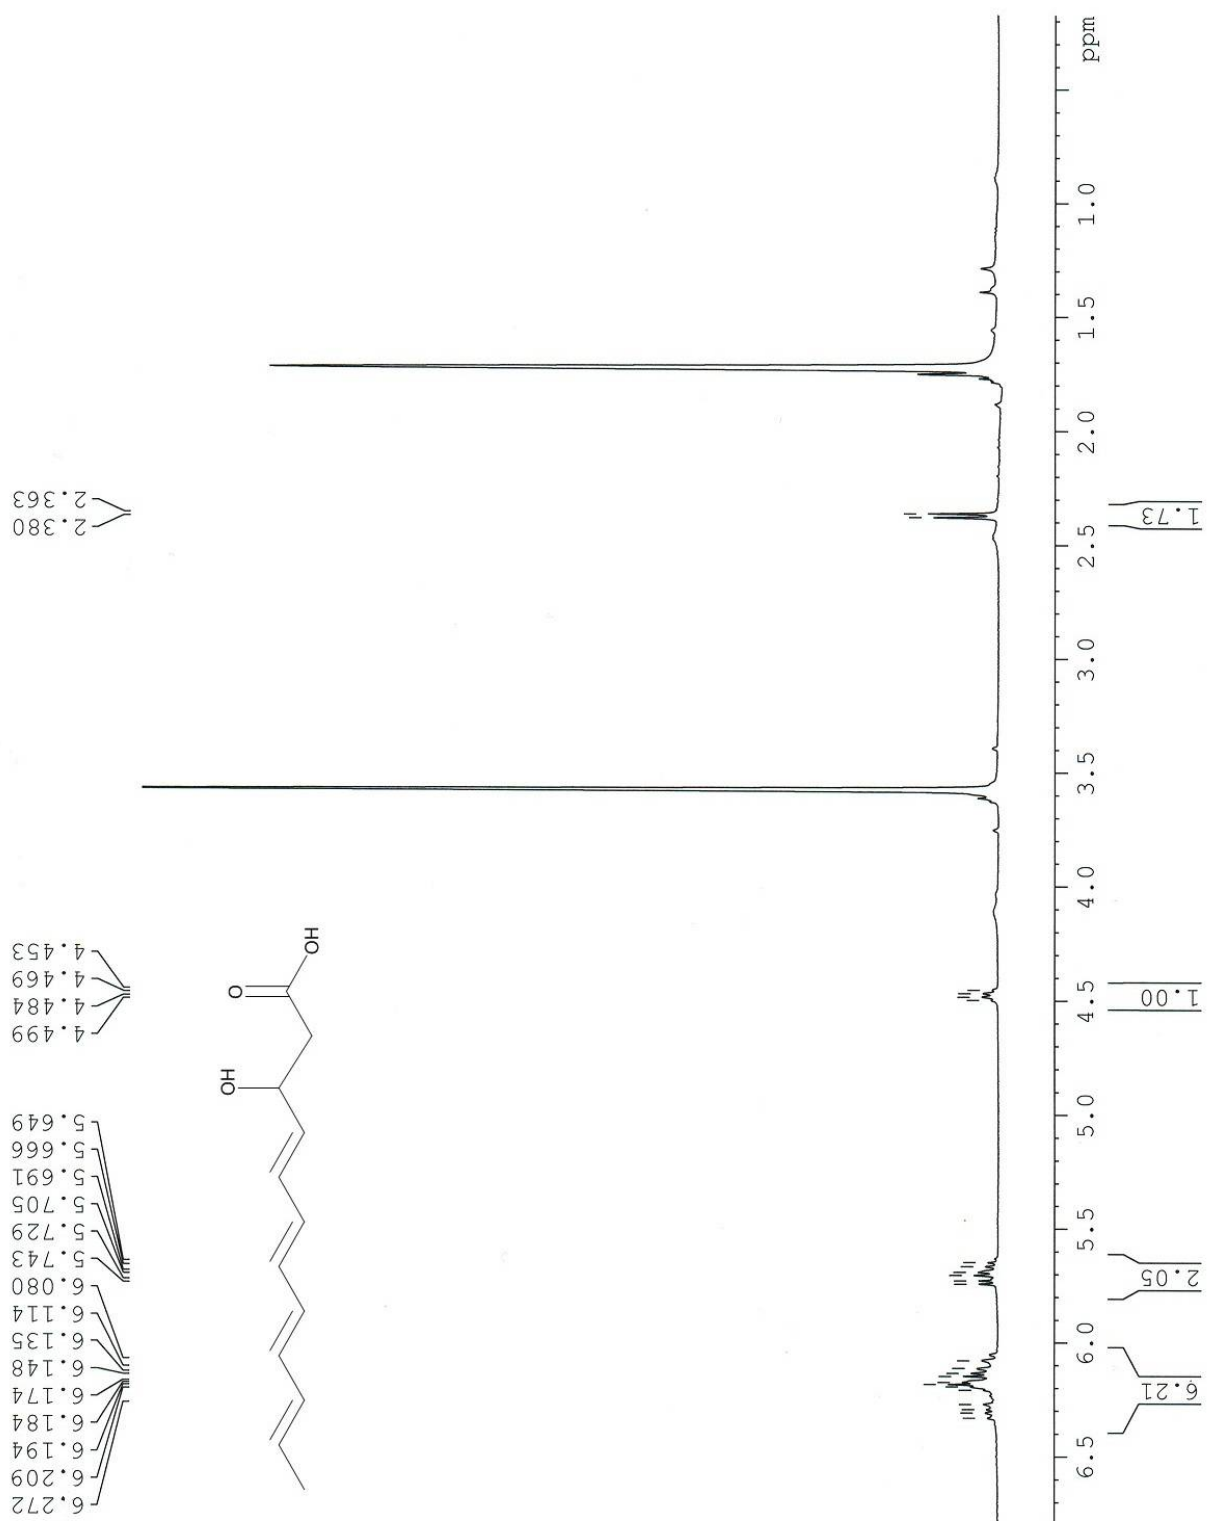

<sup>13</sup>C NMR of (7)

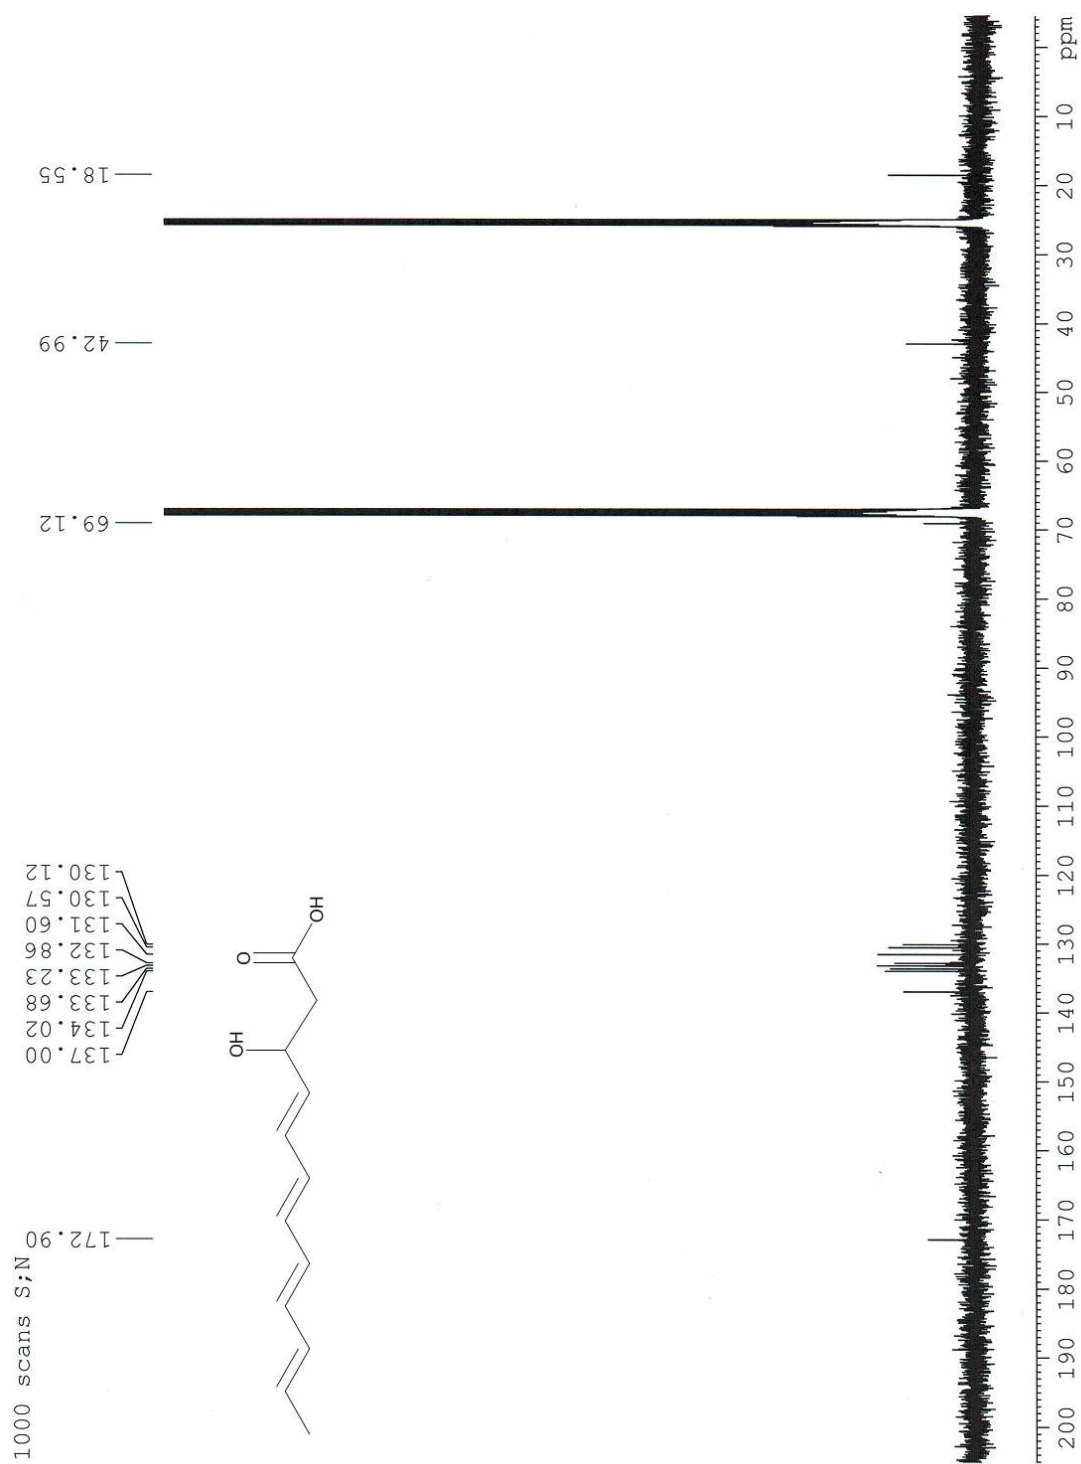

<sup>1</sup>H NMR of (8)

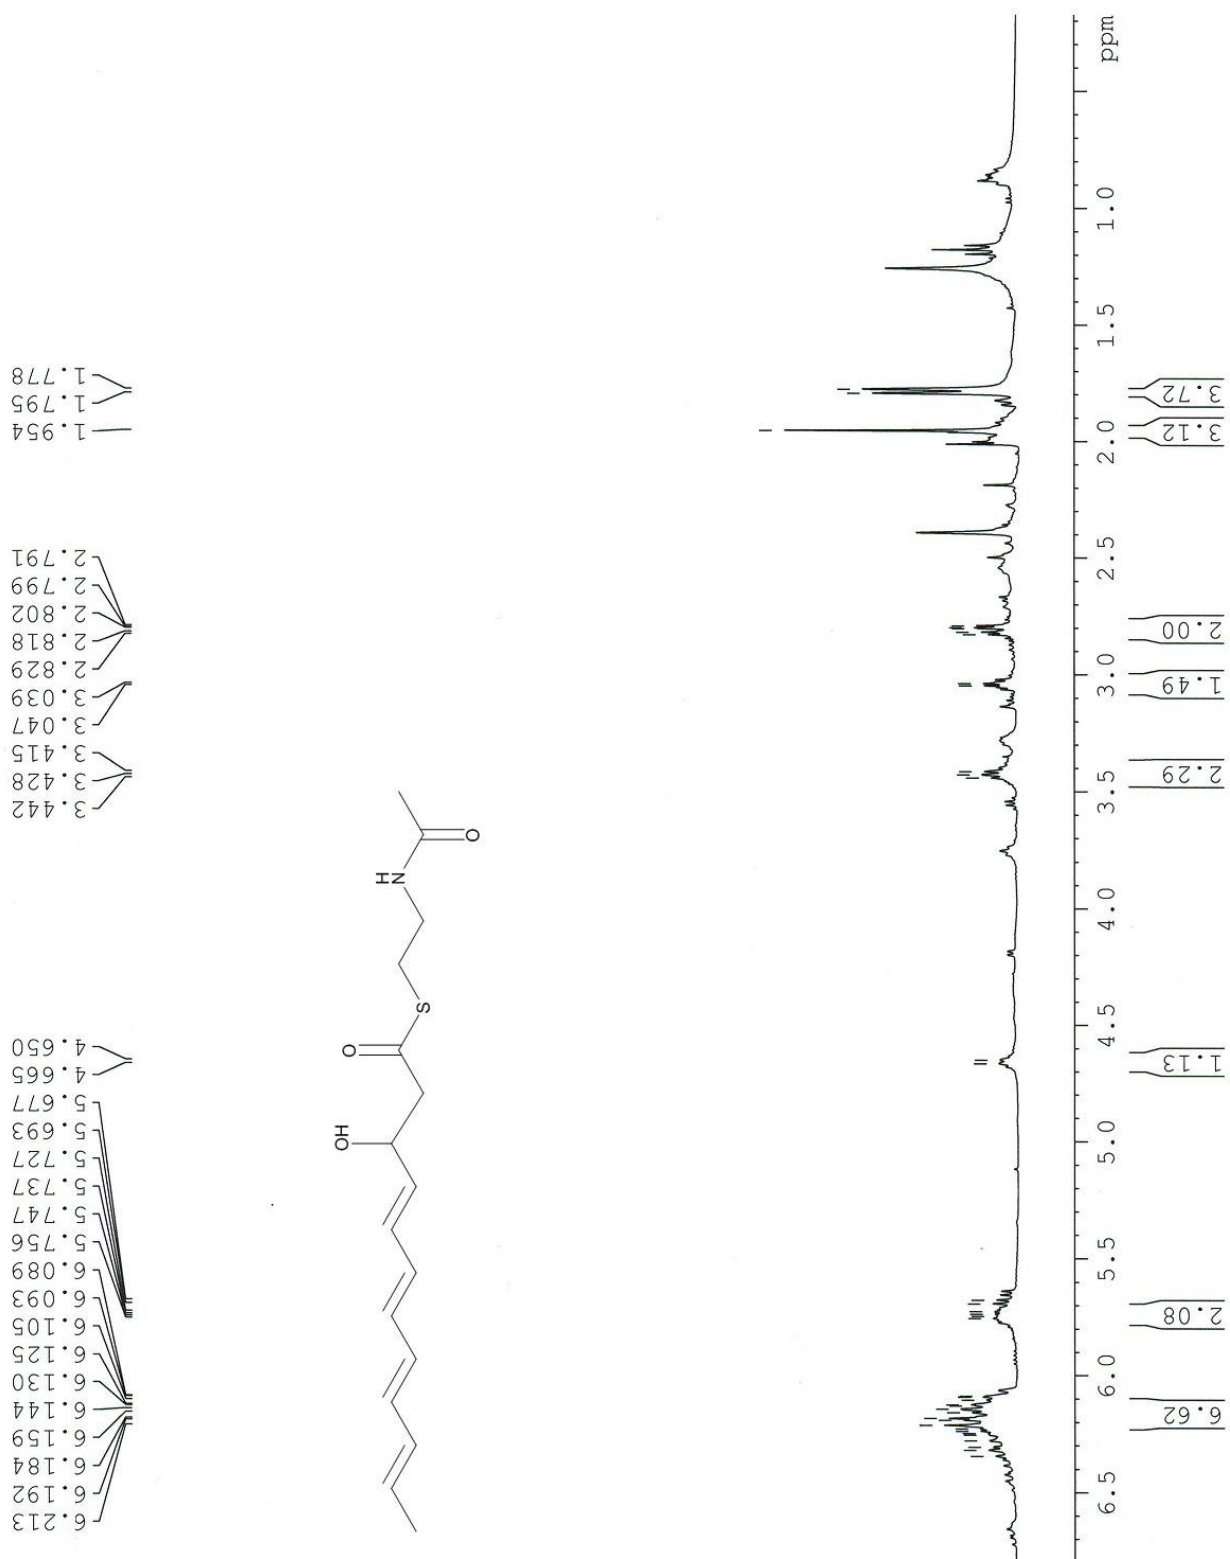

<sup>13</sup>C NMR of (8)

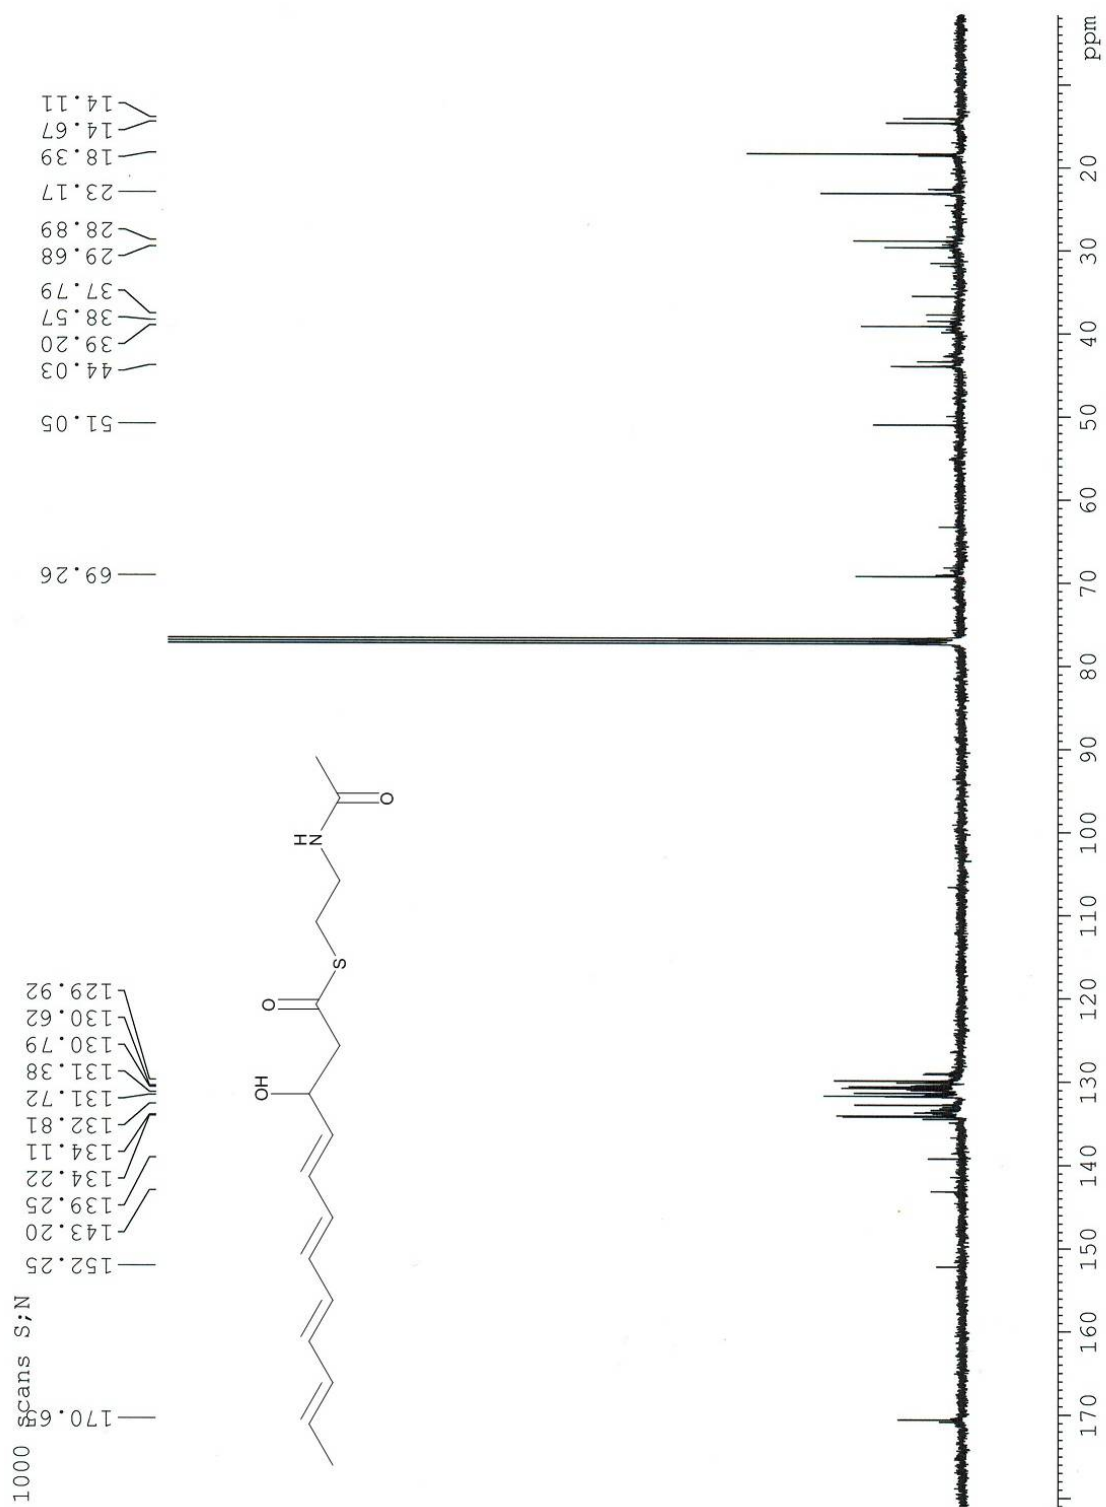

Supplement: NIHMS657772-supplement-Supplementary_Information.pdf [file NIHMS657772-supplement-Supplementary_Information.pdf]
